# Supplementary material for: Supersaturated Lipid-Based Formulations to Enhance the Oral Bioavailability of Venetoclax
Source: MDPI journal article supplement (doi:10.3390/pharmaceutics12060564), 2020-06-18
Supplement: s1 [file s1]

# Supplementary Materials: Supersaturated lipid-based formulations to enhance oral the bioavailability of venetoclax

Niklas J. Koehl, Laura J. Henze, Martin Kuentz, René Holm and Brendan T. Griffin

| Supporting information                                                            | Page |
|-----------------------------------------------------------------------------------|------|
| Figure S1. DSC of venetoclax batches.                                             | 1    |
| Figure S2. Hot-stage microscopy of venetoclax batch 1 during heating and cooling. | 2    |

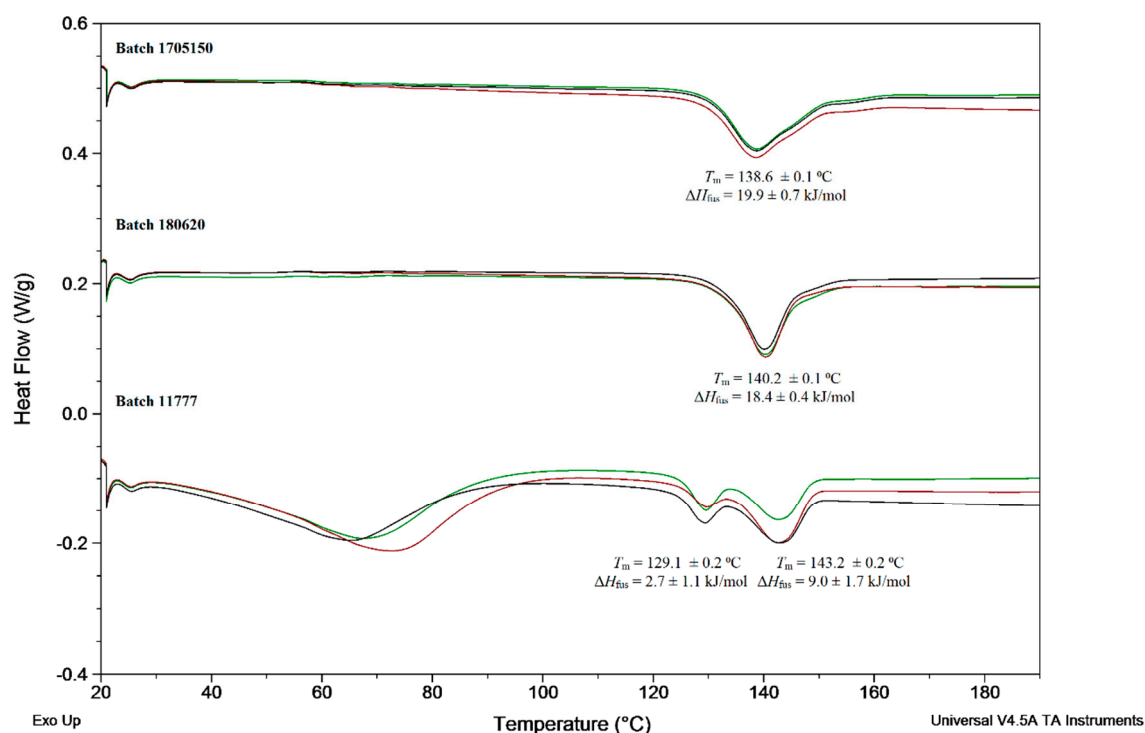

**Figure S1.** DSC of venetoclax batches. Given are the melting temperatures and enthalpy of fusion (mean  $\pm$  SD,  $n = 3$ ).

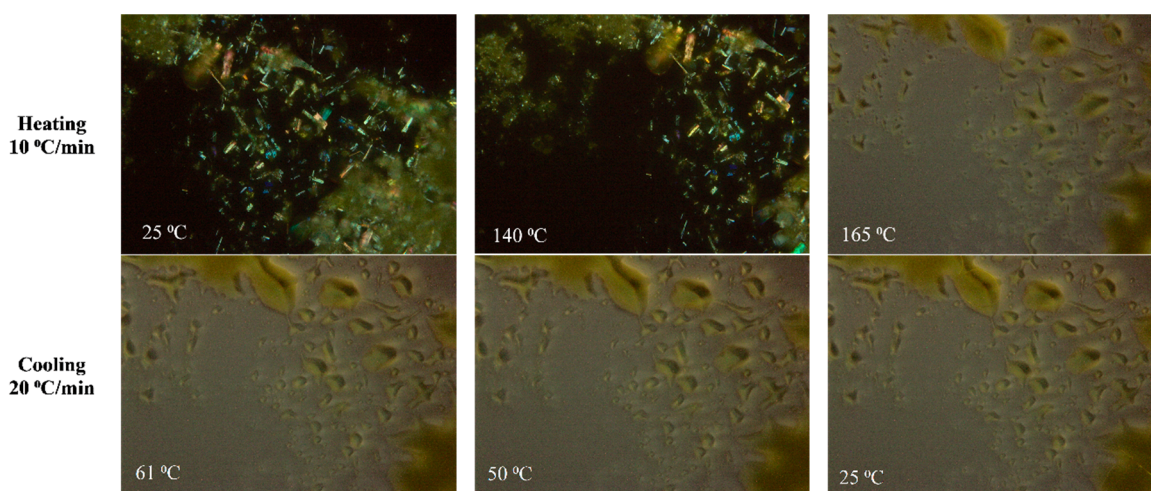

**Figure S2.** Hot-stage microscopy of venetoclax batch 1 under cross-polarised light. Pictures were taken at various temperatures during heating from room temperature to 165 °C (10 °C/min) and during cooling to 25 °C (20 °C/min).

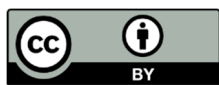

© 2020 by the authors. Submitted for possible open access publication under the terms and conditions of the Creative Commons Attribution (CC BY) license (<http://creativecommons.org/licenses/by/4.0/>).
